# Supplementary material for: Exploiting large ensembles for a better yet simpler climate model evaluation
Source: Springer Nature journal article supplement (doi:10.1007/s00382-021-05821-w), 2021-05-29

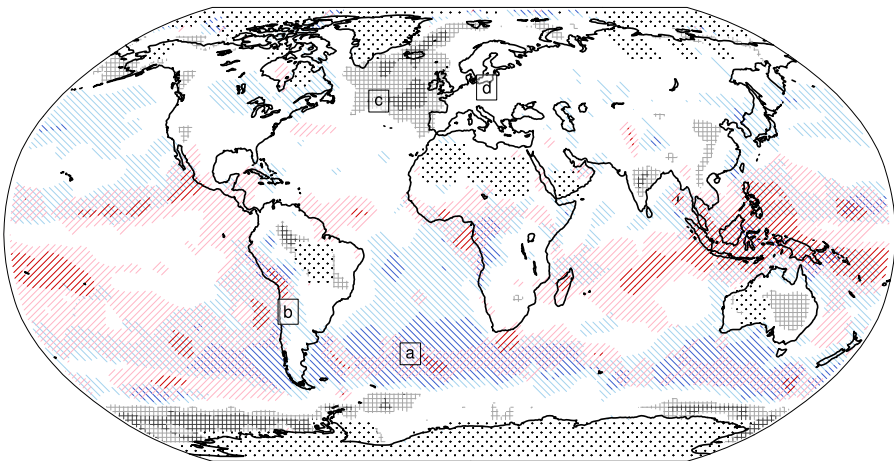

Observed annual mean values outside ensemble spread (%)

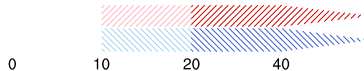

Observed annual mean values inside 75th percentile (%)

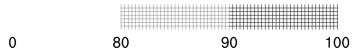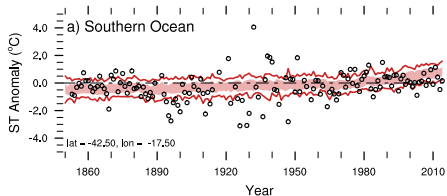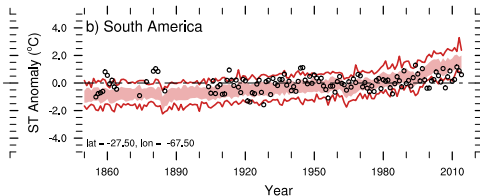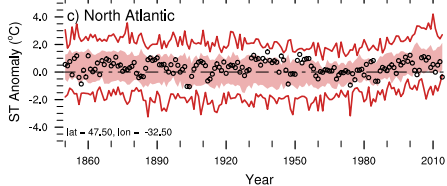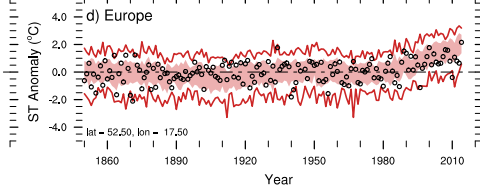

Supplement: MOESM3 [file 382_2021_5821_MOESM3_ESM.pdf]
