# Supplementary figures and images for: Exploiting large ensembles for a better yet simpler climate model evaluation
Source: Springer Nature journal article supplement (doi:10.1007/s00382-021-05821-w), 2021-05-29

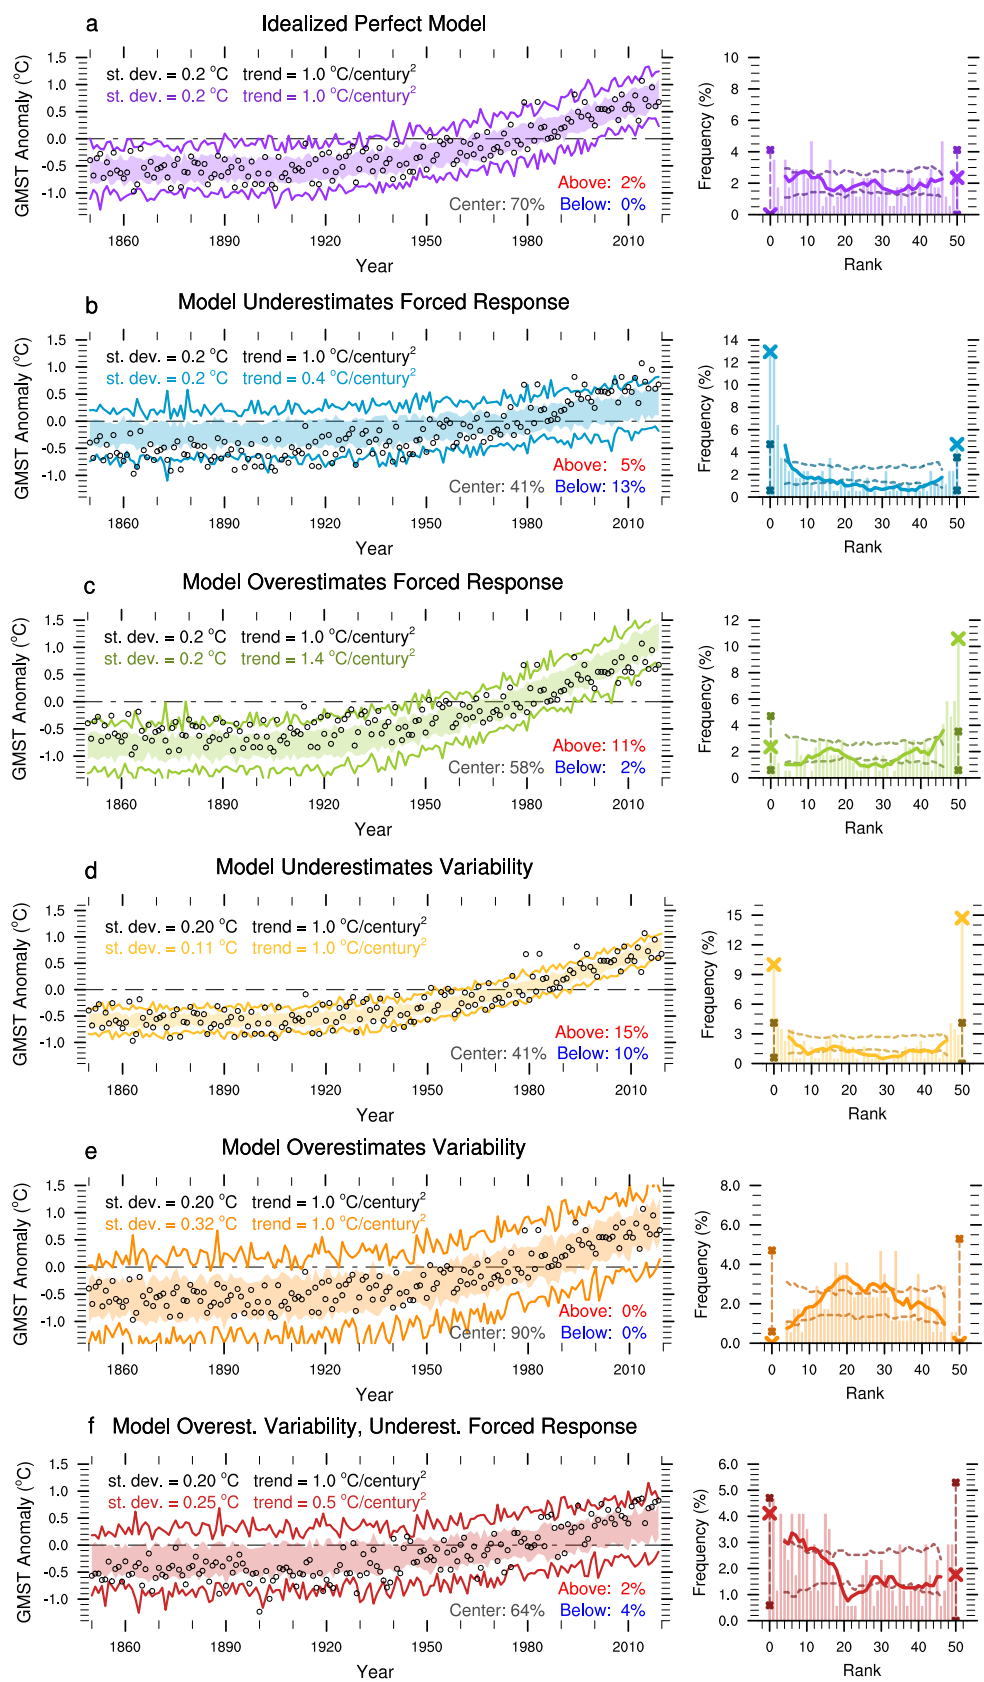

Supplement: MOESM2 [file 382_2021_5821_MOESM2_ESM.pdf]
